# Supplementary material for: Changes in capture availability due to infection can lead to detectable biases in population-level infectious disease parameters
Source: PeerJ. 2024 Feb 29;12:e16910. doi: 10.7717/peerj.16910 (PMC10909344; doi:10.7717/peerj.16910)
Supplement: Supplemental Information 1 — We show the impact of four sample sizes on the statistical outcomes discussed in our paper [file peerj-12-16910-s001.xlsx]

## Sheet: Sheet1
	slope test			Fligner test		t-test	linear model
	p value	slope	r	p value	chi squared	p value	p value	F-statistic	R2
repro over 50	0	2.52179	0.770708	2.029e-10	40.439	2.848e-08	0.1258	2.364	0.006805
repro over 100	3.58158e-13	1.52755	0.484572	6.316e-06	20.39	< 2.2e-16	0.5208	0.4138	-0.002955
repro over 500	0.96	0.998	-0.004	0.103l	2.653	< 2.2e-16	0.8189	0.0525	-0.005
repro over 1000	0.045522	1.03944	0.141581	0.4391	0.59861	< 2.2e-16	0.1965	1.679	0.003401
repro under 50	0.000195226	1.28246	0.260476	2.304e-12	49.206	< 2.2e-16	0.8022	0.06291	-0.004731
repro under 100	0.694625	0.977988	-0.0279297	0.0002852	13.165	< 2.2e-16	0.1834	1.782	0.003914
repro under 500	0.859	0.992	-0.013	0.094	2.804	< 2.2e-16	0.051	3.858	-0.014
repro under 1000	0.250426	1.03758	0.0816448	0.4288	0.62615	< 2.2e-16	0.2226	1.497	0.002492
repro control 50	0.0158803	1.17969	0.170349	2.722e-08	30.897		0.2071	1.602	0.003017
repro control 100	0.040813	1.13642	0.144778	9.125e-05	15.31		0.651	0.2052	-0.00401
repro control 500	9.24e-06	1.16	0.31	0.05	3.843		0.283	1.158	-0.0007
repro control 1000	0.740849	1.00924	0.0235303	0.6297	0.23241		0.2118	1.569	0.002852
	p value	slope	r	p value	chi squared	p value	p value	F-statistic	R2
relative risk over allele 50	8.84344e-11	0.862616	-0.437964	0.05804	3.5926	9.437e-10	0.2526	1.317	0.001588
relative risk over allele 100	0	0.807219	-0.662326	0.006224	7.4843	< 2.2e-16	0.4388	0.6018	-0.002005
relative risk over allele 500	0	0.755	-0.753	0.015	5.861	< 2.2e-16	0.109	2.597	0.008
relative risk over allele 1000	0	0.787085	-0.861464	0.008072	7.0174	< 2.2e-16	5.295e-07	26.89	0.1151
relative risk under allele 50	0	2.34394	0.845095	1.631e-05	18.578	2.655e-15	0.0002789	13.69	0.05996
relative risk under allele 100	0	2.32081	0.860765	0.0001016	15.107	< 2.2e-16	0.0005494	12.34	0.05391
relative risk under allele 500	0	2.04	0.906	0.005	7.911	< 2.2e-16	5.09e-16	78.22	0.28
relative risk under allele 1000	0	1.70929	0.832675	0.001243	10.426	< 2.2e-16	4.394e-12	54.39	0.2115
relative risk control allele 50	5.88226e-09	1.16631	0.396992	0.5764	0.31203		0.9941	5.545e-05	-0.00505
relative risk control allele 100	1.6157e-05	1.0662	0.299762	0.9377	0.0061121		0.2437	1.367	0.001842
relative risk control allele 500	6.43e-09	1.05	0.396	0.889	0.02		0.311	1.034	0.0002
relative risk control allele 1000	8.54806e-06	1.02143	0.308935	0.8531	0.034301		0.9109	0.01256	-0.004987
relative risk over het 50	7.50629e-05	0.896999	-0.276252	0.1536	2.0365	5.777e-13	0.1132	2.532	0.007639
relative risk over het 100	0.000678764	0.925596	-0.238299	0.07937	3.0777	< 2.2e-16	0.2903	1.124	0.0006236
relative risk over het 500	0	0.835	0.827	0.037	4.348		0.004	9.538	0.037
relative risk over het 1000	0	0.83974	-0.782265	0.032	4.5983	< 2.2e-16	3.749e-05	17.79	0.07781
relative risk under het 50	0	2.35764	0.826489	0.0005703	11.871	< 2.2e-16	0.2555	1.301	0.001508
relative risk under het 100	0	1.64684	0.78522	6.967e-05	15.82	< 2.2e-16	0.1435	2.158	0.005783
relative risk under het 500	0	1.56	0.827	0.006	7.615		2.6e-05	18.57	0.081
relative risk under het 1000	0	1.58439	0.860872	6.856e-05	15.85	< 2.2e-16	2.265e-09	39.26	0.1613
relative risk control het 50	0.000313428	1.12346	0.252284	0.5638	0.33311		0.09726	2.776	0.008846
relative risk control het 100	0.000182493	1.07156	0.261622	0.982	0.00050662		0.1067	2.626	0.008103
relative risk control het 500	0.002	1.04	0.216	0.85	0.36		0.084	3.025	0.01
relative risk control het 1000	0.000896619	1.02433	0.233056	0.8483	0.036592		0.1551	2.037	0.005185
	p value	slope	r	p value	chi squared	p value	p value	F-statistic	R2
allele freq over allele 50	0	2.34647	0.720156	6.395e-15	60.776	8.539e-08	0.2096	1.584	0.002928
allele freq over allele 100	0	2.08458	0.690363	1.319e-13	54.823	3.661e-16	0.02494	5.106	0.02021
allele freq over allele 500	8.179e-08	1.309	0.415	0.003	8.859	< 2.2e-16	0.546	0.365	-0.003
allele freq over allele 1000	0.000338898	1.14985	0.250906	0.1014	2.6834	< 2.2e-16	0.06459	3.454	0.01218
allele freq under allele 50	0	2.41209	0.748584	9.503e-15	59.996	3.916e-13	0.8516	0.03511	-0.004872
allele freq under allele 100	0	1.98879	0.649412	7.956e-13	51.293	< 2.2e-16	0.1728	1.872	0.004364
allele freq under allele 500	1.355e-05	1.245	0.368	0.02	5.653	< 2.2e-16	0.423	0.646	-0.002
allele freq under allele 1000	0.00174452	1.10725	0.220027	0.0877	2.9161	< 2.2e-16	0.7604	0.09322	-0.004578
allele freq control allele 50	0	2.43026	0.742567	< 2.2e-16	86.493		0.07788	3.141	0.01064
allele freq control allele 100	0	1.85599	0.616783	6.427e-14	56.236		0.789	0.07184	-0.004686
allele freq control allele 500	6.672e-08	1.291	0.373	< 2.2e-16	135.09		0.832	0.045	-0.004
allele freq control allele 1000	1.17268e-05	1.16226	0.304418	0.1889	1.726		0.5635	0.3348	-0.003354
allele freq over het 50	0	3.57538	0.859669	< 2.2e-16	121.96	4.304e-07	0.3815	0.7692	-0.001161
allele freq over het 100	0	3.79859	0.882518	< 2.2e-16	135.35	< 2.2e-16	0.01165	6.484	0.02682
allele freq over het 500	0	3.785	0.879	< 2.2e-16	110.55	< 2.2e-16	0.833	0.044	-0.005
allele freq over het 1000	0	2.63406	0.776419	< 2.2e-16	80.173	< 2.2e-16	0.2845	1.152	0.0007613
allele freq under het 50	0	3.86033	0.881236	< 2.2e-16	131.52	< 2.2e-16	0.1676	1.918	0.004593
allele freq under het 100	0	3.7458	0.87293	< 2.2e-16	137.53	< 2.2e-16	0.766	0.08878	-0.0046
allele freq under het 500	0	4.024	0.895	< 2.2e-16	139.4	< 2.2e-16	0.547	0.364	-0.003
allele freq under het 1000	0	2.54606	0.763352	< 2.2e-16	94.411	< 2.2e-16	0.2743	1.202	0.001013
allele freq control het 50	0	3.90314	0.886783	< 2.2e-16	111.13		0.3302	0.9529	-0.0002368
allele freq control het 100	0	3.66456	0.870167	< 2.2e-16	129.54		0.4646	0.537	-0.002332
allele freq control het 500	0	3.86	0.891	< 2.2e-16	139.4		0.228	1.463	0.002
allele freq control het 1000	0	2.54323	0.764747	< 2.2e-16	113.4		0.1173	2.475	0.007358
